# Supplementary material for: SLC35D3 promotes white adipose tissue browning to ameliorate obesity by NOTCH signaling
Source: PubMed Central journal article supplement (PMC10667520; doi:10.1038/s41467-023-43418-5), 2023-11-23
Supplement: 41467_2023_43418_MOESM1_ESM.pdf [file 41467_2023_43418_MOESM1_ESM.pdf]

## Supplementary information

### **Title: SLC35D3 promotes white adipose tissue browning to ameliorate obesity by NOTCH signaling**

Hongrui Wang<sup>#1</sup>, Liang Yu<sup>#1</sup>, Jin'e Wang<sup>#2</sup>, Yaqing Zhang<sup>2</sup>, Mengchen Xu<sup>1</sup>,  
Cheng Lv<sup>1</sup>, Bing Cui<sup>1</sup>, Mengmeng Yuan<sup>1</sup>, Yu Zhang<sup>1</sup>, Yupeng Yan<sup>1</sup>, Rutai Hui<sup>1</sup>,  
Yibo Wang<sup>\*1</sup>

1, State Key Laboratory of Cardiovascular Disease, Fuwai Hospital, National Center for Cardiovascular Diseases, Chinese Academy of Medical Sciences and Peking Union Medical College, Beijing, China.

2, College of Medical Science, China Three Gorges University, Yichang, Hubei, China.

<sup>#</sup>, these authors contributed equally: Hongrui Wang, Liang Yu, Jin'e Wang.

**\*Correspondence:** Yibo Wang, State Key Laboratory of Cardiovascular Disease, National Center for Cardiovascular Diseases, Fuwai Hospital, Chinese Academy of Medical Sciences and Peking Union Medical College, 167 Beilishi Rd, Beijing, 100037, China. E-mail: [yibowang@hotmail.com](mailto:yibowang@hotmail.com).

**Supplementary Figure 1. Adipose-specific *Slc35d3* knockout induced adipose tissue inflammation and liver steatosis in mice.**

**a** qPCR analysis of *F4/80* expression in EpiWAT from SAKO (n=9) and Flox (n=9) mice. **b** Immunostaining for F4/80 in the EpiWAT of SAKO and Flox mice. Representative images from six independent experiments are shown, as well as the quantitative analysis results. ATM, adipose tissue macrophage. Scale bar, 20  $\mu$ m. **c** qPCR analysis of the expression of the inflammatory factors *Il-6*, *Il-1 $\beta$* , *Tnf- $\alpha$* , and *Ccl2* in EpiWAT from SAKO (n=9) and Flox (n=9) mice. **d** Representative western blots for *Il-6*, *Tnf- $\alpha$* , *Ccl2* and  $\beta$ -Actin proteins in the EpiWAT of SAKO (n=3) and Flox (n=3) mice fed an NCD. Right panel, summary of the quantification of three independent experiments. **e** Weight of livers from SAKO (n=9) and Flox (n=9) mice. **f** HE staining results of liver tissues from SAKO and Flox mice. Representative images from three independent experiments are shown. Scale bar, 20  $\mu$ m. **g** Hepatic TG, TC and FFA levels in SAKO (n=6) and Flox (n=6) mice. **h** Western blots for *Slc35d3*, *Notch1*, *Hes1* and  $\beta$ -Actin protein in the livers of SAKO (n=3) and Flox (n=3) mice. Right panel, summary of the quantification of three independent experiments. Data are expressed as the mean  $\pm$  SEM. Statistical significance was assessed by unpaired two-sided Student's t test (a-e and g-h). The exact *P* values are shown in the figure. SAKO, *Slc35d3* adipocyte-specific knockout; EpiWAT, epididymal white adipose tissue; TG, triglyceride; TC, total cholesterol; FFA, free fatty acid. Source data are provided as a Source Data file.

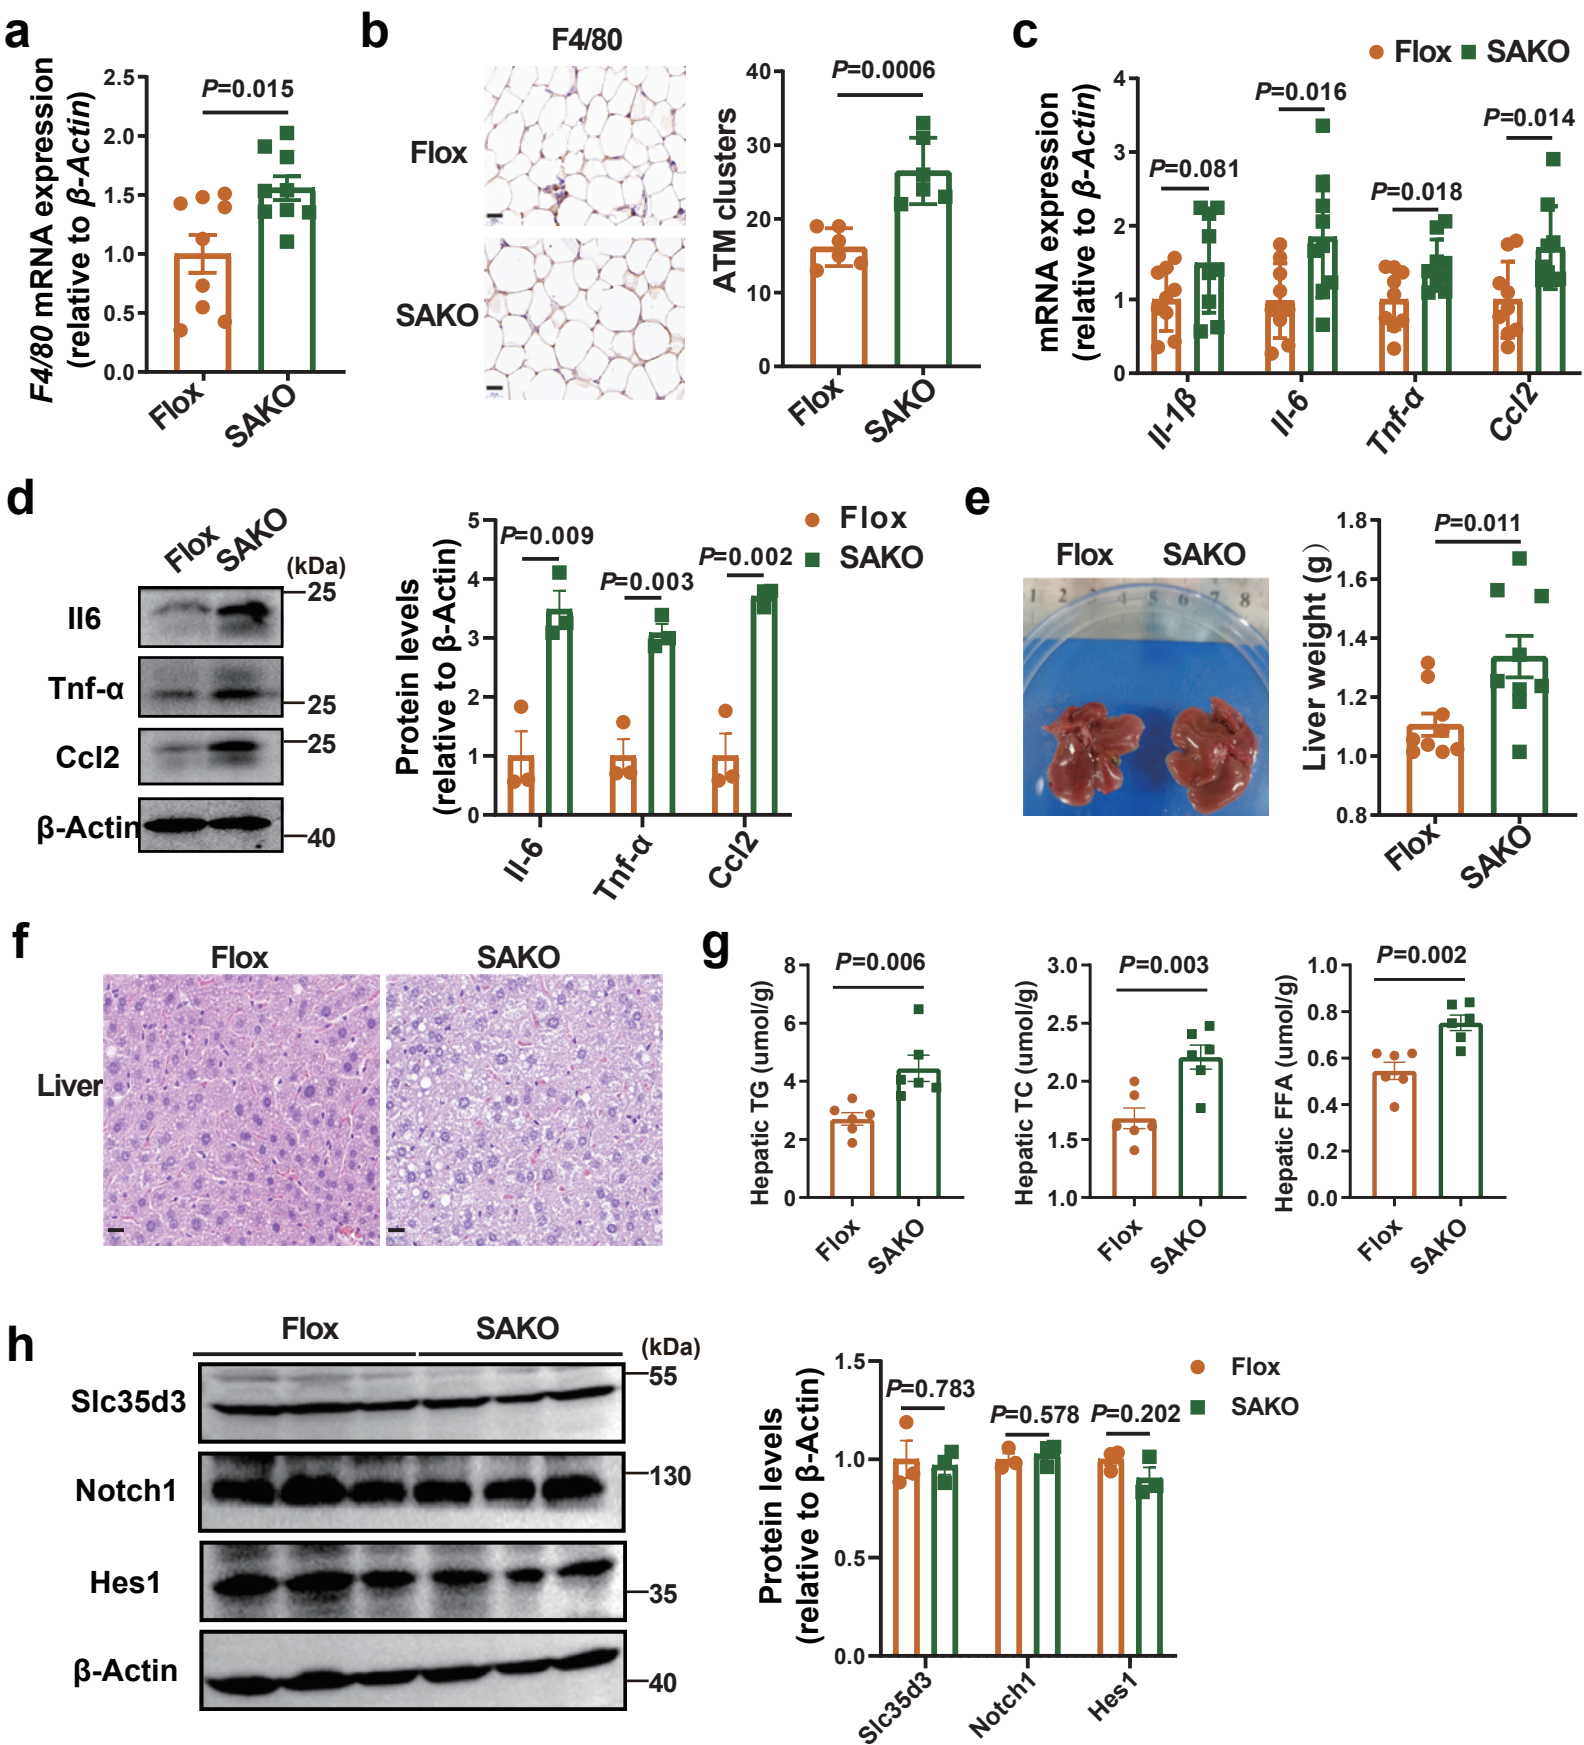

**Supplementary Figure 2. Browning phenotypes of the EpiWAT and BAT in SAKO mice.**

**a, e** HE staining results of the EpiWAT (a) and BAT (e) from SAKO and Flox mice. Representative HE images from three independent experiments are shown. Right panel of a, the quantitative results of the size of each adipocyte counted (Flox, n=113 cells; SAKO, n=102 cells). Scale bar, 50  $\mu$ m. **b, f** qPCR analysis of *Ucp1* expression in the EpiWAT (b) and BAT (f) from SAKO (n=6) mice and their Flox littermates (n=6). **c, g** Immunostaining for *Ucp1* in the EpiWAT (c) and BAT (g) from SAKO and Flox mice. Representative images from three independent experiments are shown. Scale bar, 50  $\mu$ m. **d, h** Representative western blot results of *Ucp1* expression in the EpiWAT (d) and BAT (h) from SAKO (n=3) mice and their Flox littermates (n=3). Right panel, summary of the quantification of three independent experiments. Data are expressed as the mean  $\pm$  SEM. Statistical significance was assessed by unpaired two-sided Student's t test (a-b, d, f and h). The exact *P* values are shown in the figure. SAKO, *Slc35d3* adipocyte-specific knockout; EpiWAT, epididymal white adipose tissue; BAT, brown adipose tissue. Source data are provided as a Source Data file.

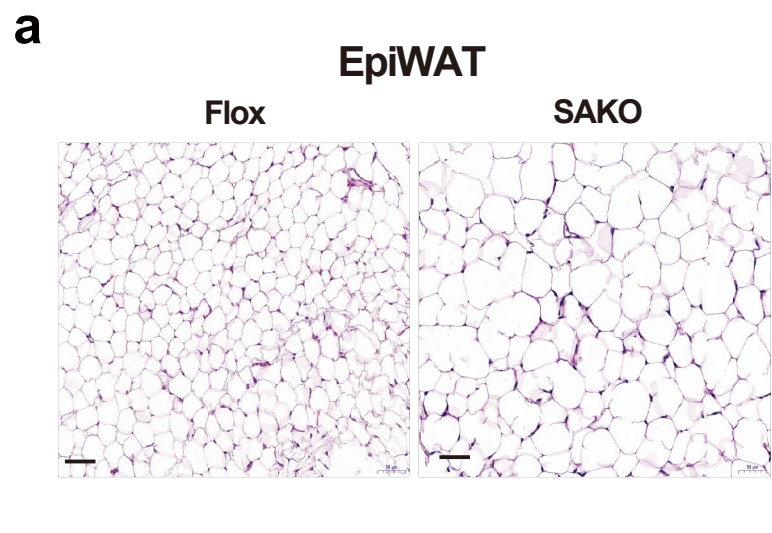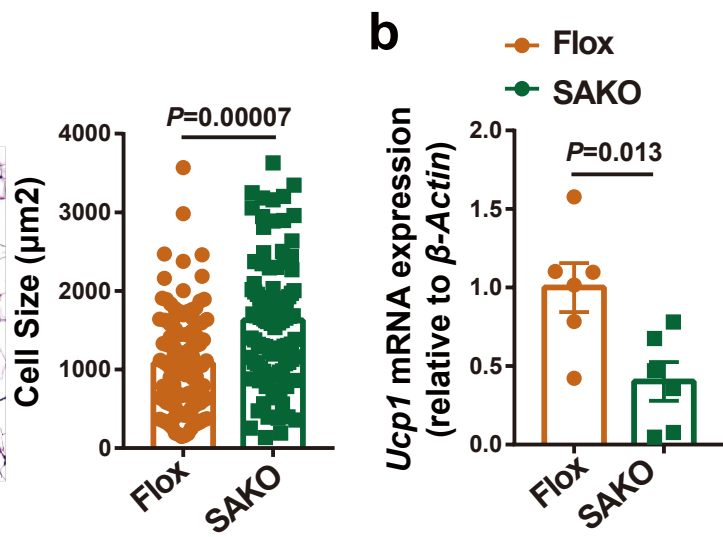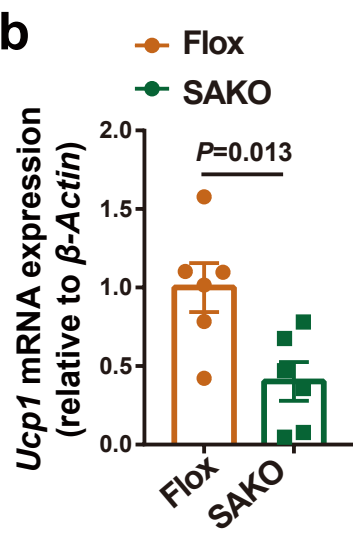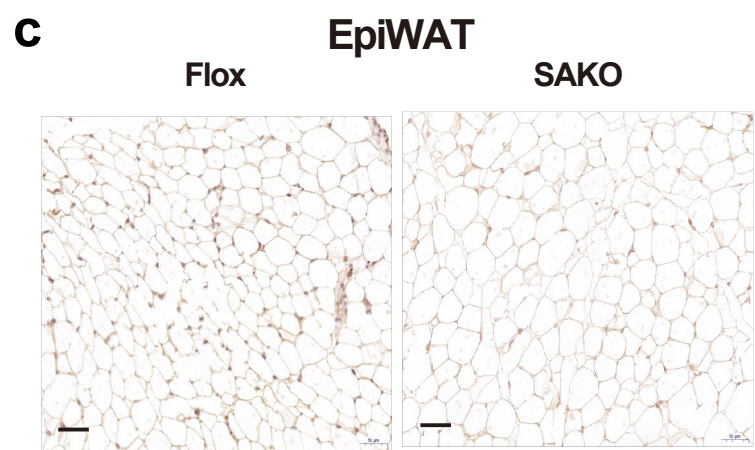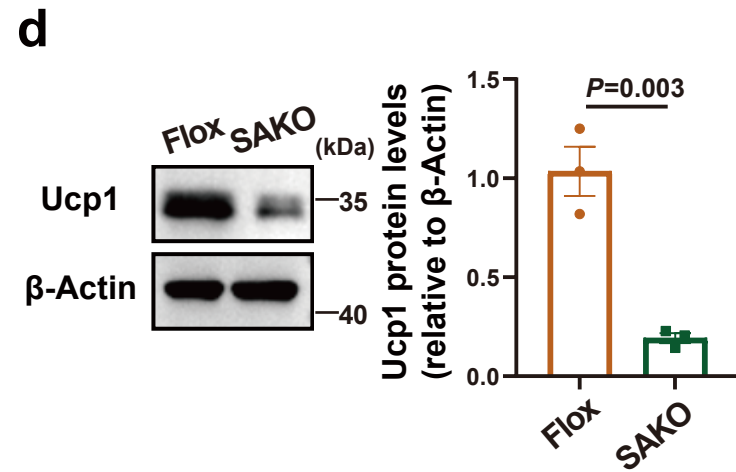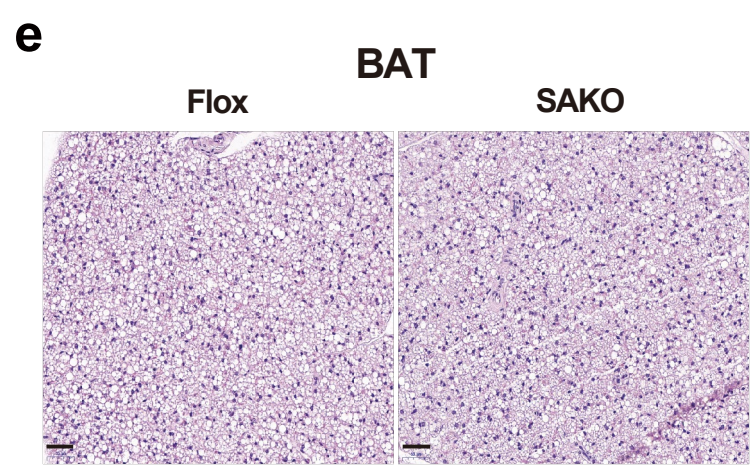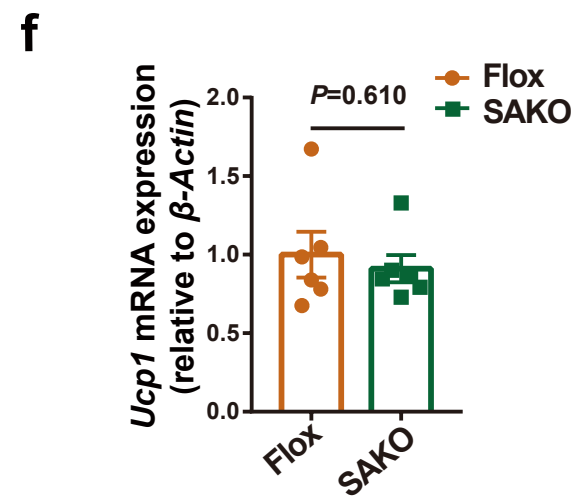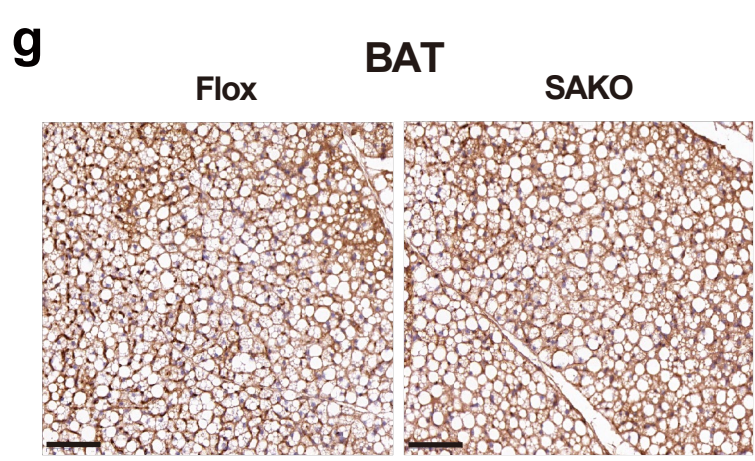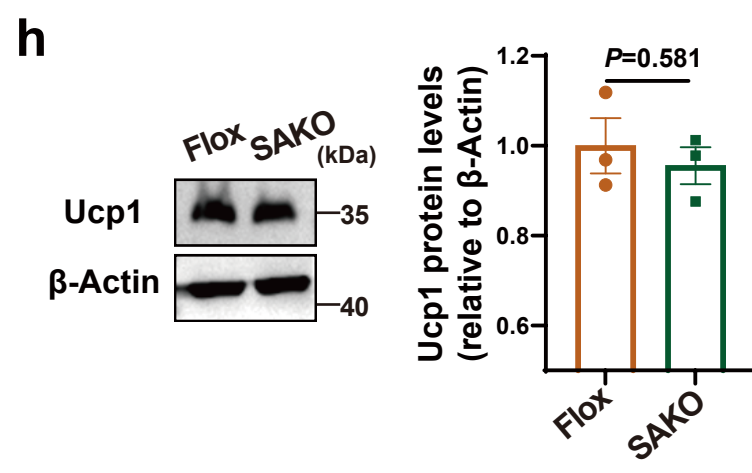

**Supplementary Figure 3. Adipose-specific *Slc35d3* knock-in protected mice from obesity.**

**a** Schematic diagram of NCD feeding. SAKI and WT mice were fed an NCD from 4 to 18 weeks of age. **b** Body weight curve of SAKI (n=5) and WT (n=11) mice fed an NCD ( $P=0.047, 0.008, 0.009, 0.015, 0.026, 0.003, 0.004, 0.032$  for SAKI mice and controls from 9 to 16 weeks). **c-e** Body weights (c), body lengths (d) and fat pad weights (e) of SAKI (n=6) mice and WT (n=6) mice fed an NCD. **f** Serum lipid profiles (TG, TC and FFA) in SAKI (n=9) mice and their WT littermates (n=9). **g-h** Blood glucose concentrations during IP-GTT (g) and IP-ITT (h) in NCD-fed SAKI mice and their WT littermates; n=5 per group. AUC values are shown. Data are expressed as the mean  $\pm$  SEM. Statistical significance was assessed by unpaired two-sided Student's t test (c-f) or two-way ANOVA followed by Bonferroni's multiple comparisons test (b and g-h). The exact  $P$  values are shown in the figure or corresponding legends; \* $P<0.05$ . AUC, area under the curve; EpiWAT, epididymal white adipose tissue; BAT, brown adipose tissue; IngWAT, inguinal white adipose tissue; AsWAT, anterior-subcutaneous white adipose tissue; TG, triglyceride; TC, total cholesterol; FFA, free fatty acid; NCD, normal chow diet; SAKI, *Slc35d3* adipocyte-specific knockin. Source data are provided as a Source Data file.

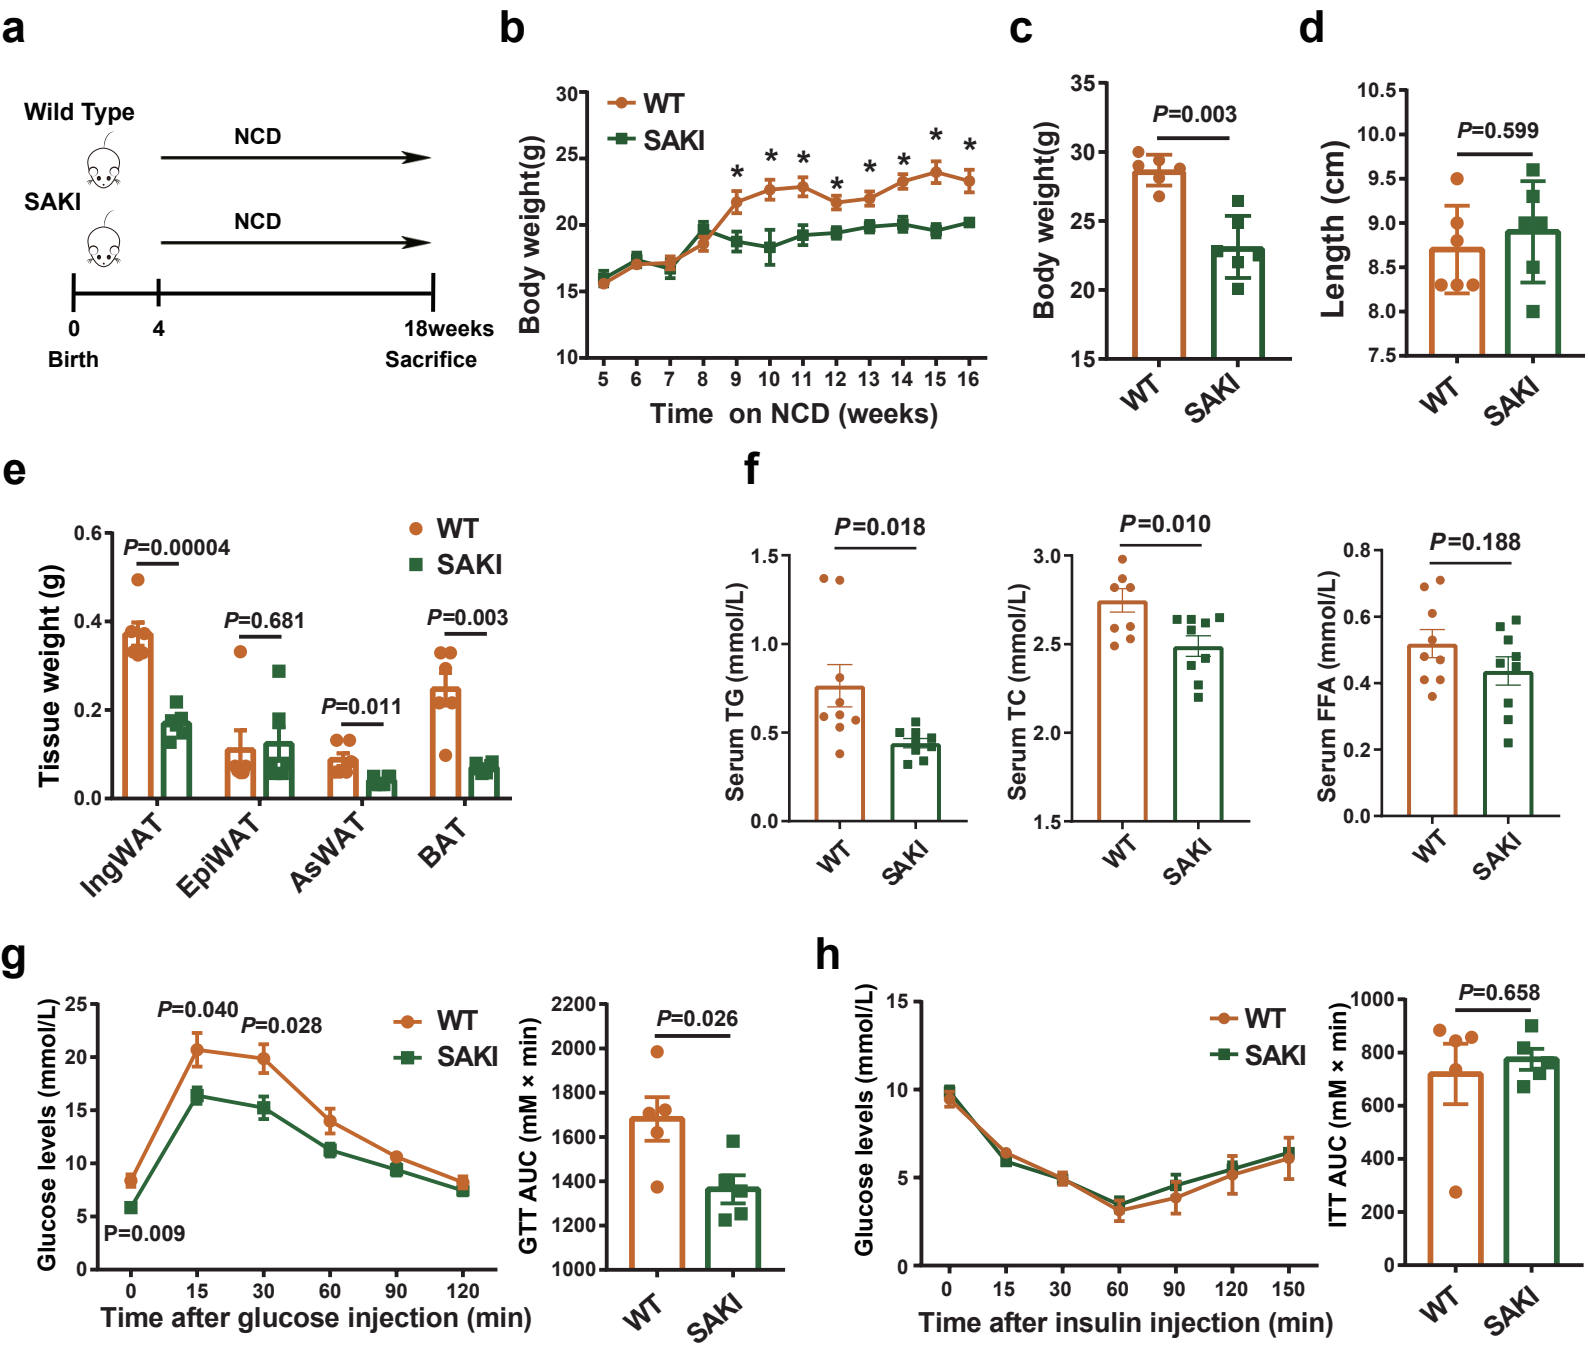

**Supplementary Figure 4. Adipose-specific *Slc35d3* knockin protected mice from adipose tissue inflammation and liver steatosis.**

**a, i** qPCR analysis results of macrophagocytic marker *F4/80* in the EpiWAT from SAKI and WT mice fed an NCD (a) or HFD (i); n=9 per group. **b, j** Immunostaining for F4/80 in the EpiWAT from SAKI and WT mice fed an NCD (b) or HFD (j). Representative images and quantitative analysis results of six independent experiments are shown. ATM, adipose tissue macrophage. Scale bar, 20  $\mu$ m. **c, k** qPCR analysis results of the inflammatory factors *Il-6*, *Il-1 $\beta$* , *Tnf- $\alpha$* , and *Ccl2* in the EpiWAT from SAKI and WT mice fed an NCD (c) or HFD (k); n=9 per group. **d, l** Representative western blot for *Il-6*, *Tnf- $\alpha$* , *Ccl2* and  $\beta$ -Actin in the EpiWAT from SAKI and WT mice fed an NCD (d) or HFD (l); n=3 per group. The quantification of three independent experiments is shown in the right panel. **e, m** Weight of livers from SAKI and WT mice fed an NCD (e, n=9 per group) or HFD (m, n=6 per group). **f, n** HE staining results of liver tissues from SAKI and WT mice fed an NCD (f) or HFD (n). Representative images from three independent experiments are shown. Scale bar, 20  $\mu$ m. **g, o** Hepatic TG, TC and FFA levels in SAKI and WT mice fed an NCD (g) or HFD (o); n=6 per group. **h, p** Western blots for *Slc35d3*, *Notch1*, *Hes1* and  $\beta$ -Actin in the liver of SAKI and WT mice fed an NCD (h) or HFD (p); n=3 per group. The quantification of three independent experiments is shown in the right panel. Data are expressed as the mean  $\pm$  SEM. Statistical significance was assessed by unpaired two-sided Student's t test (a-e, g-m, o-p). The exact *P* values are shown in the figure. EpiWAT, epididymal white adipose tissue; TG, triglyceride; TC, total cholesterol; FFA, free fatty acid; NCD, normal chow diet; HFD, high fat diet; SAKI, *Slc35d3* adipocyte-specific knockin. Source data are provided as a Source Data file.



## NCD

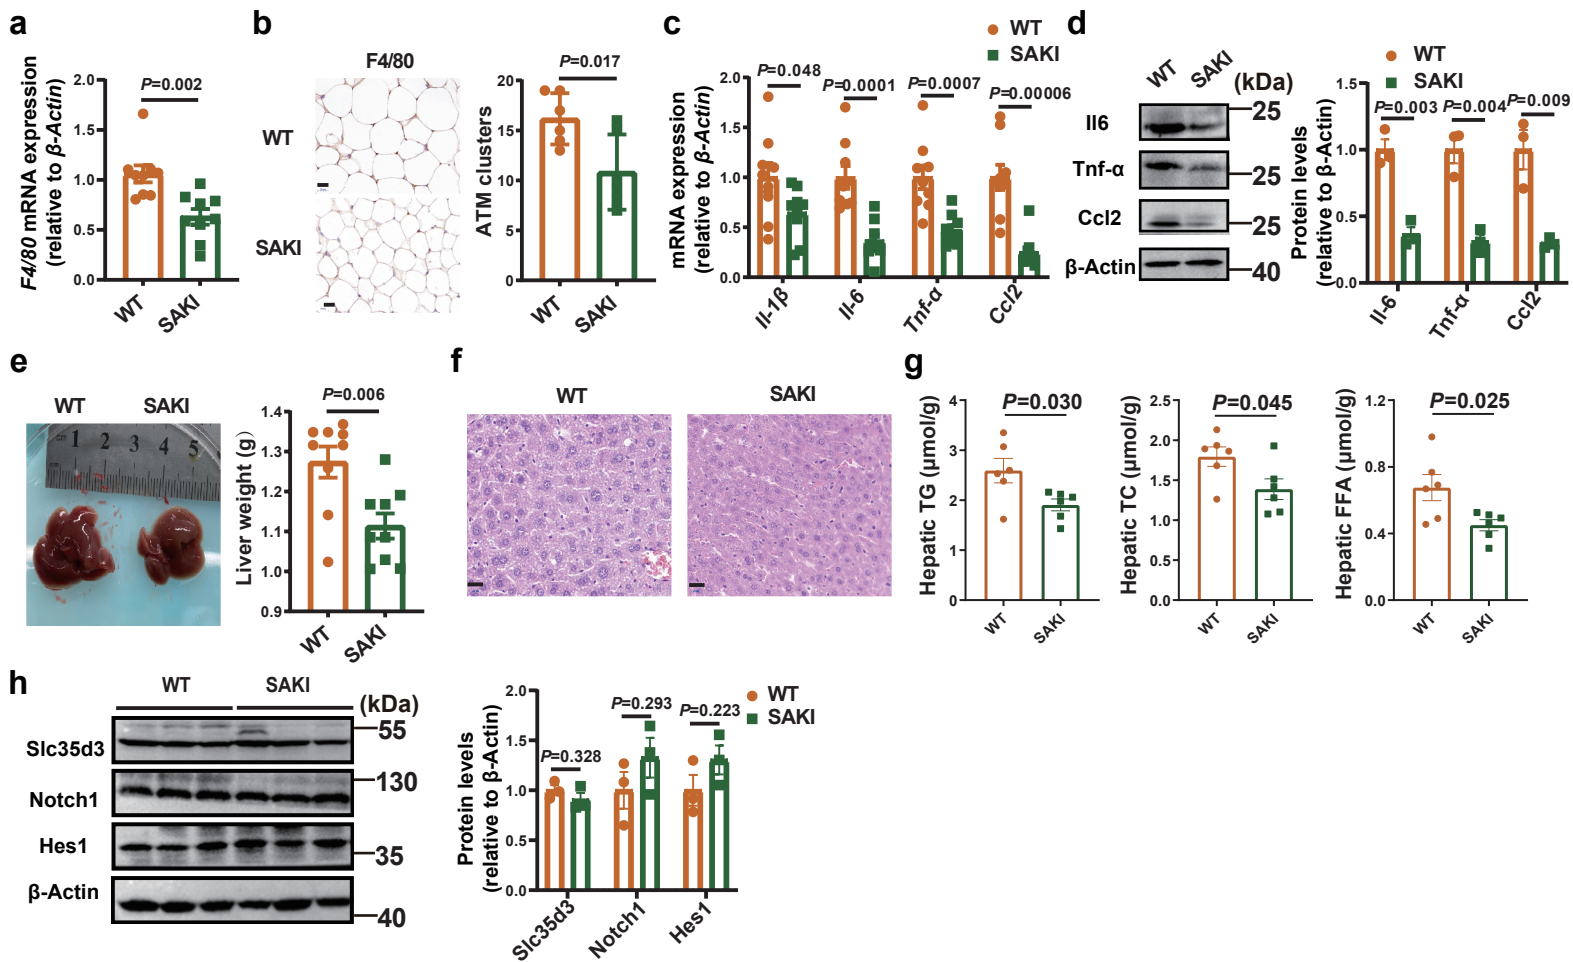

## HFD

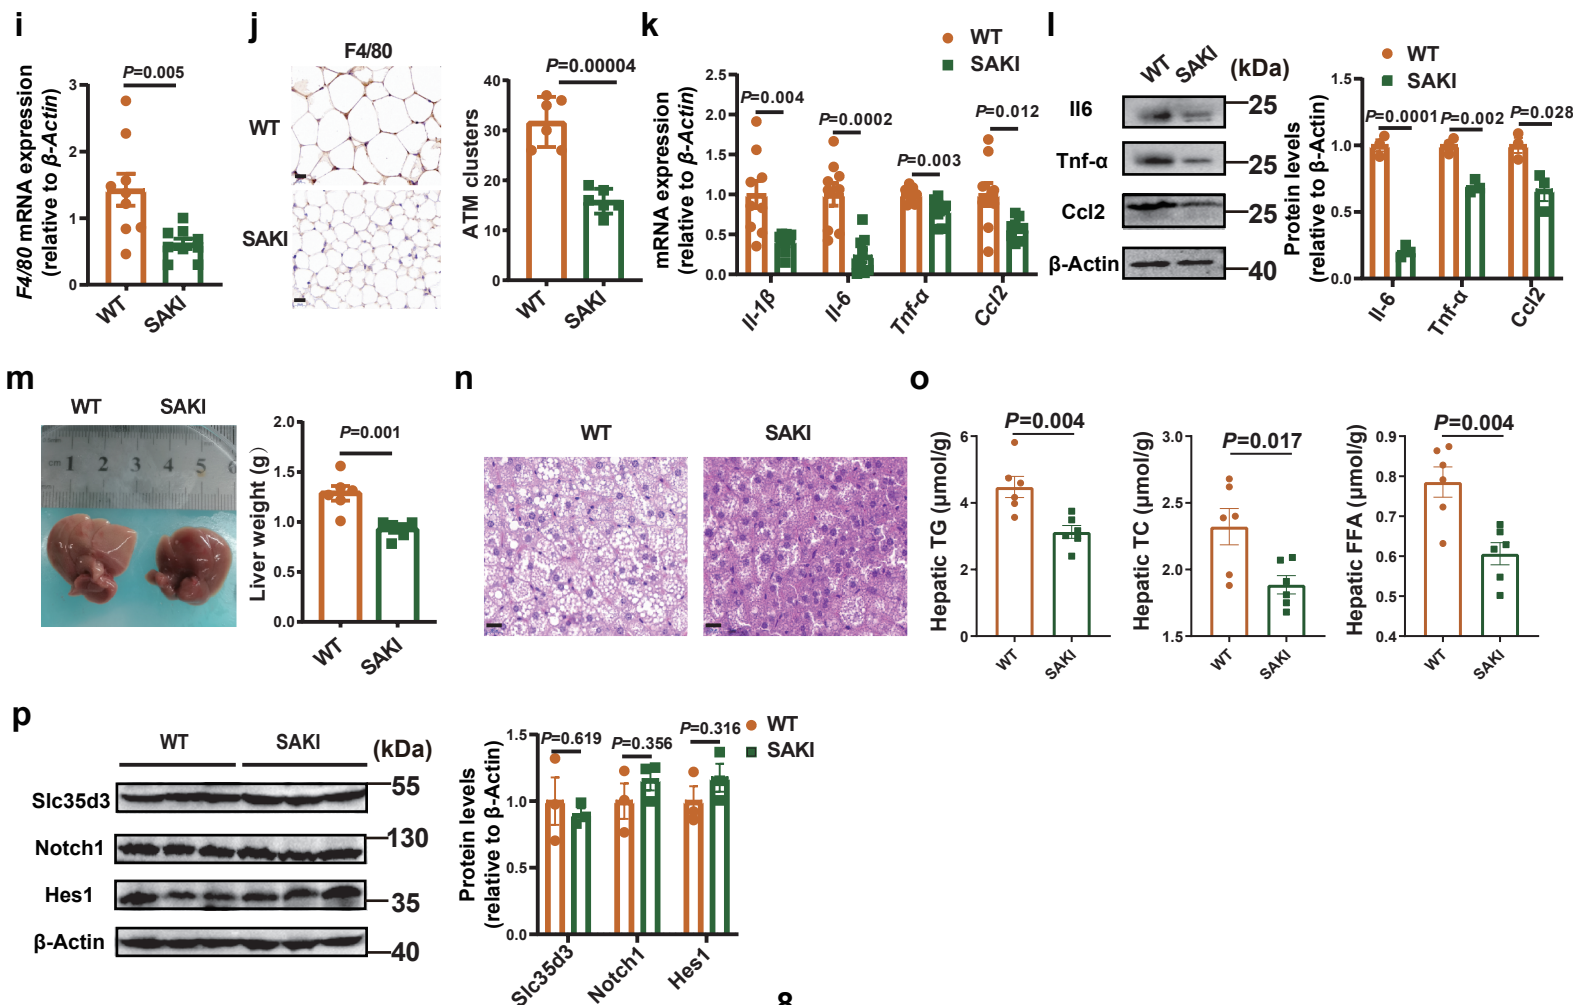

**Supplementary Figure 5. Browning phenotype of IngWAT in NCD-fed SAKI mice.**

**a** Food intake of NCD-fed SAKI (n=30) mice and WT mice (n=30). **b** Activity of NCD-fed SAKI (n=5) mice and WT mice (n=5). **c-e** Oxygen consumption (c), carbon dioxide production (d) and energy expenditure (e) of NCD-fed SAKI (n=5) and WT mice (n=5). **f** The various components of oxygen consumption rates of mature adipocytes from NCD-fed SAKI (n=3) and WT (n=3) mice. The asterisks in the figure represent the exact *P*-values in the order: *P*=0.033, *P*=0.029, *P*=0.041, *P*=0.006, *P*=0.012. **g** Rectal temperatures of NCD-fed SAKI (n=5) mice and WT mice (n=5), which were recorded during cold stimulation for 4 h and returned to RT for 10 min. **h-j** The expression levels of thermogenesis genes (h), beige adipocyte markers (i), and mitochondria-related genes (j) in the IngWAT of NCD-fed SAKI (n=9) and WT mice (n=9). **k** Representative western blots of thermogenesis proteins in the IngWAT from SAKI and WT mice; n=3 per group. The quantification of three independent experiments is shown. **l** Immunostaining for Ucp1 in the IngWAT of NCD-fed SAKI mice and WT mice. Representative images from three independent experiments are shown. Scale bar, 50  $\mu$ m. **m** HE staining and adipocyte cell size measurements of IngWAT from NCD-fed SAKI mice and WT mice. Representative HE images from three independent experiments are shown. Right panel, the quantitative results of the size of each adipocyte counted (WT, n=110 cells; SAKI, n=106 cells). Scale bar, 500  $\mu$ m (left); 20  $\mu$ m (right). **n** Expression levels of lipolysis genes in the IngWAT from NCD-fed SAKI (n=9) mice and WT mice (n=9). Data are expressed as the mean  $\pm$  SEM. Statistical significance was assessed by unpaired two-sided Student's *t* test (a-b, f-k and m-n) or two-way ANCOVA (c-e). The exact *P* values are shown in the figure or corresponding legends; \**P*<0.05. SAKI, *Slc35d3* adipocyte-specific knockin; IngWAT, inguinal white adipose tissue; RT, room temperature. Source data are provided as a Source Data file.

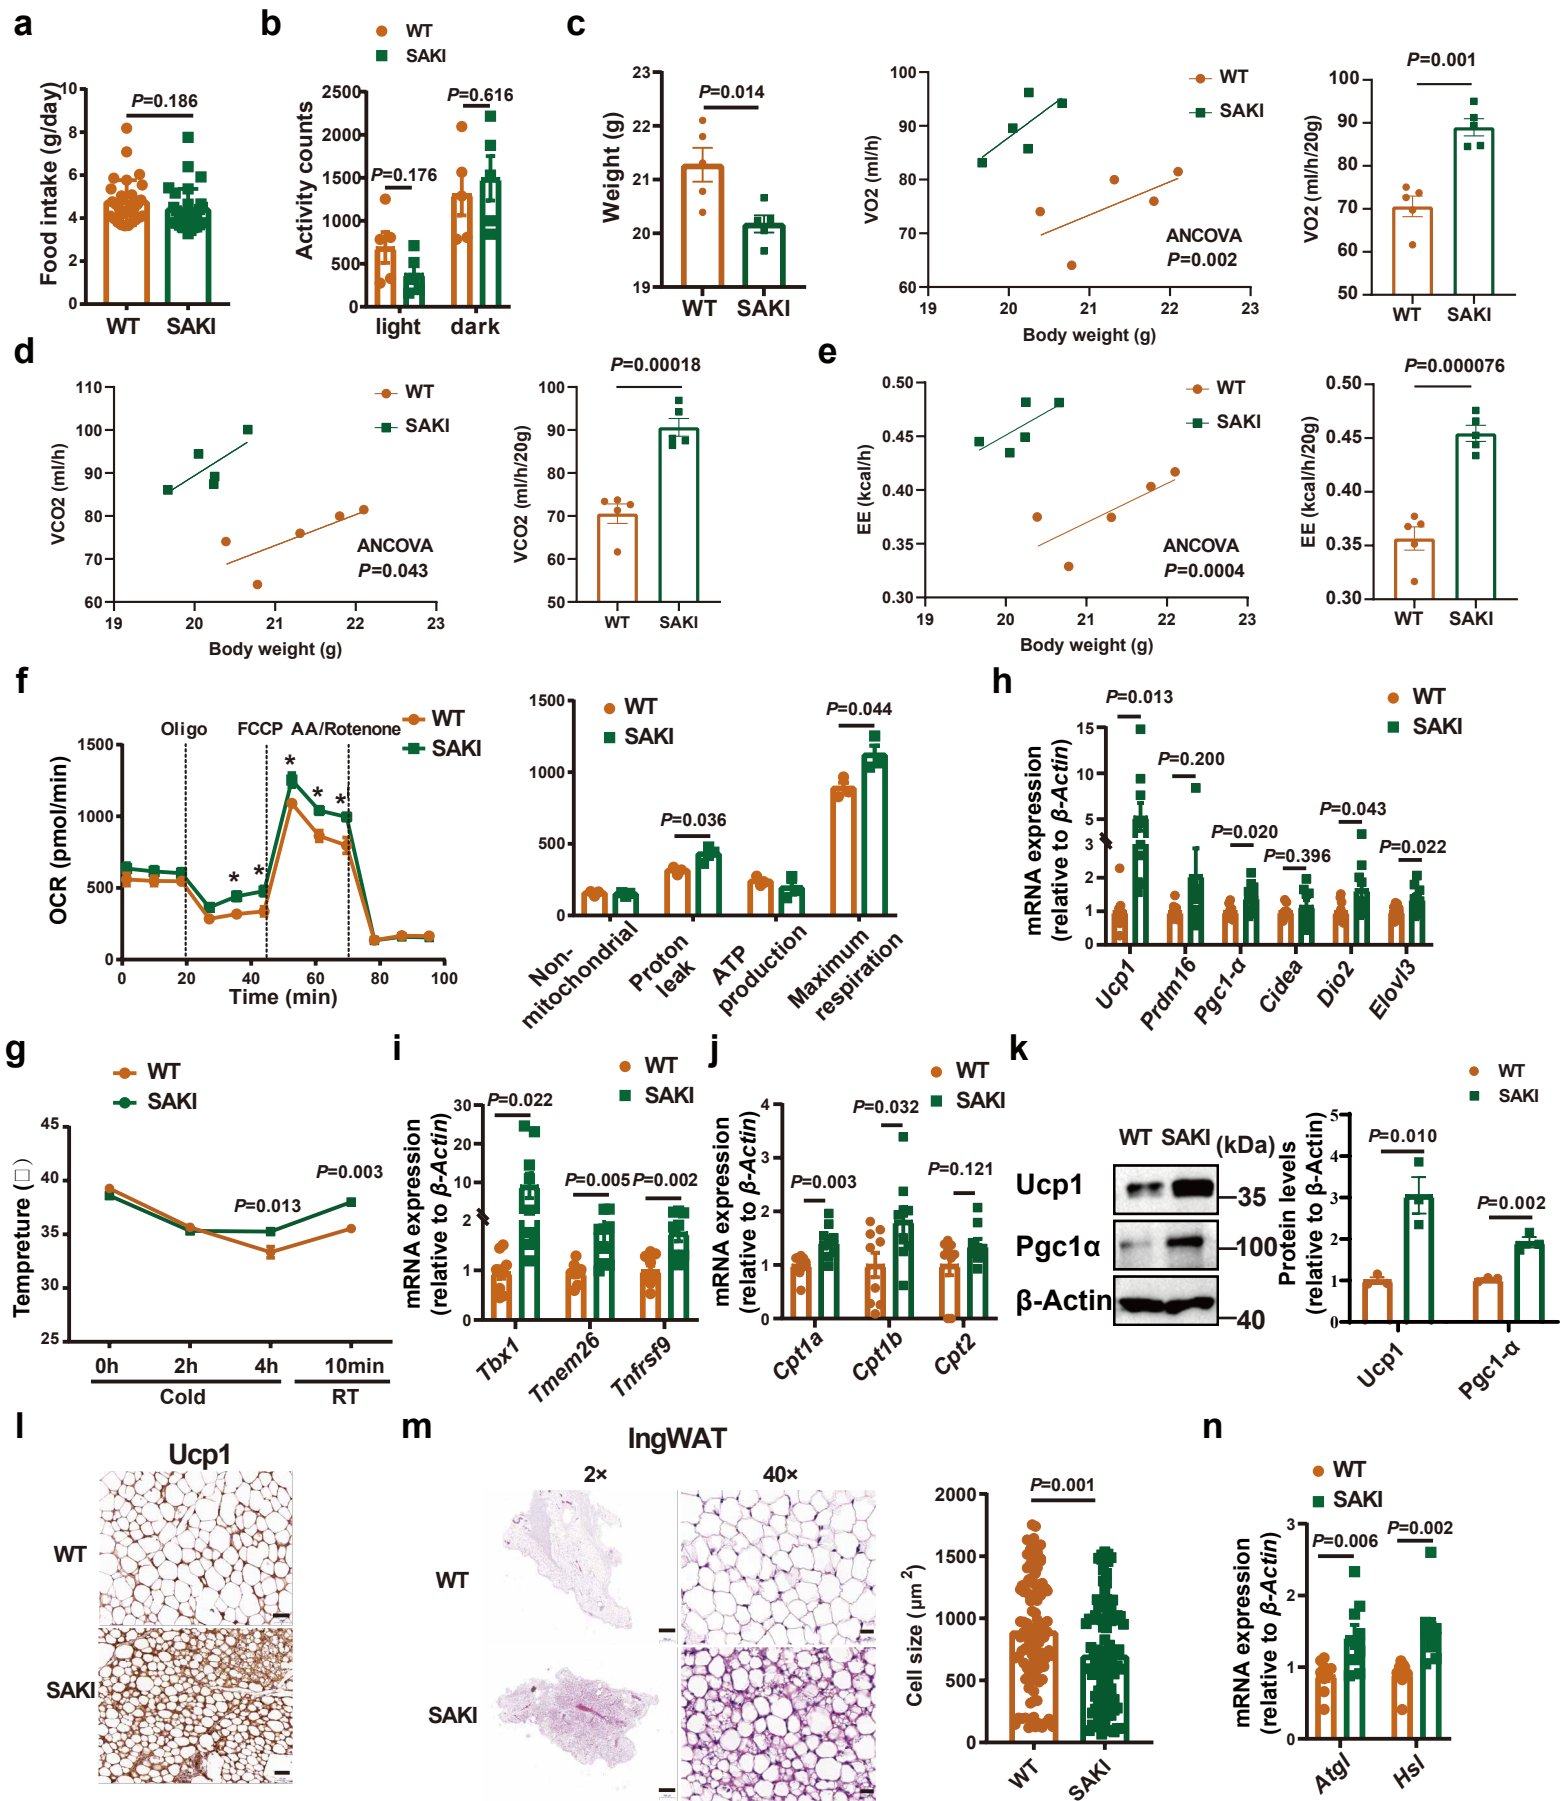

**Supplementary Figure 6. Adipocyte size of EpiWAT in SAKI mice.**

**a** HE staining and adipocyte cell size measurements of EpiWAT in NCD-fed SAKI mice and their WT littermates. Representative HE images from three independent experiments are shown. Right panel, the quantitative results of the size of each adipocyte counted (WT, n=117 cells; SAKI, n=140 cells). Scale bar, 50  $\mu$ m. **b** HE staining and adipocyte cell size measurements of EpiWAT in HFD-fed SAKI mice and their WT littermates. Representative HE images from three independent experiments are shown. Right panel, the quantitative results of the size of each adipocyte counted (WT, n=100 cells; SAKI, n=126 cells). Scale bar, 50  $\mu$ m. Data are expressed as the mean  $\pm$  SEM. Statistical significance was assessed by unpaired two-sided Student's t test (a-b). The exact *P* values are shown in the figure. EpiWAT, epididymal white adipose tissue; NCD, normal chow diet; HFD, high fat diet; SAKI, *Slc35d3* adipocyte-specific knockin. Source data are provided as a Source Data file.

# NCD

a

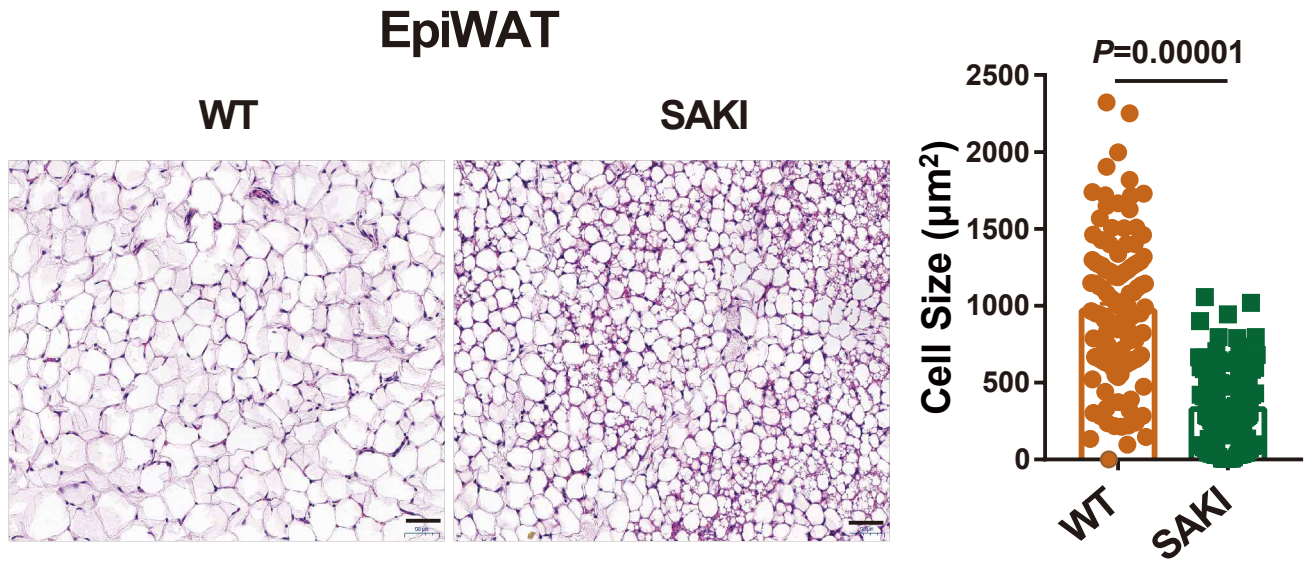

# HFD

b

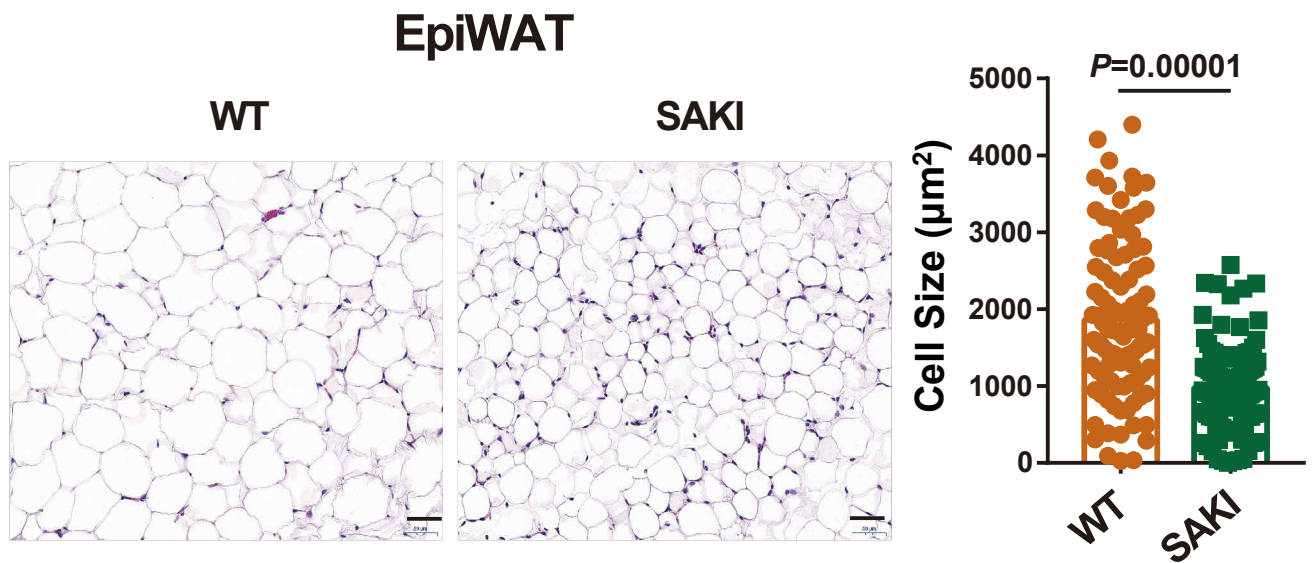

**Supplementary Figure 7. The interaction between SLC35D3 and NOTCH1.**

**a** In SLC35D3-overexpressing cells, SLC35D3 and NOTCH1 colocalized. Representative confocal images of three independent experiments are shown, and the inset in the bottom panel shows a magnified view of the indicated area. Scale bar, 20  $\mu$ m. **b** CoIP assay results showed no interaction between SLC35D3 and NICD. Representative images from three independent experiments are shown. **c** CoIP assay results showed the interaction between SLC35D3-30aa and ECD. Representative images from three independent experiments are shown. **d-e** Multiplex fluorescence staining results of cells transfected with SLC35D3 plasmid and ECD plasmid, as well as cells transfected with SLC35D3 plasmid and NICD plasmid. SLC35D3 and ECD colocalized and both colocalized with ER (d), while SLC35D3 and NICD did not colocalize (e). Representative confocal images of four independent experiments are shown, and the inset in the bottom panel shows a magnified view of the indicated area. Scale bar, 50  $\mu$ m. **f-g** NOTCH1 levels were downregulated in the plasma membrane when SLC35D3 was overexpressed (f). The quantitative analysis results of three independent experiments (g) are shown. **h-i** Membrane NOTCH1 levels in SLC35D3-overexpressing HEK293T cells and control cells were detected by flow cytometric analysis. Binding curves were generated by determining the NOTCH1 mean fluorescence density (MFI). The quantitative analysis results of three independent experiments (i) are shown. **j** Live cell imaging results obtained using a high-content imaging system. Representative images of four independent experiments are shown, and the inset in the right panel shows a magnified view of the indicated area. Scale bar, 20  $\mu$ m. Data are expressed as the mean  $\pm$  SEM. Statistical significance was assessed by unpaired two-sided Student's t test (g, i). The exact P values are shown in the figure. OE, overexpression; ER, endoplasmic reticulum. Source data are provided as a Source Data file.

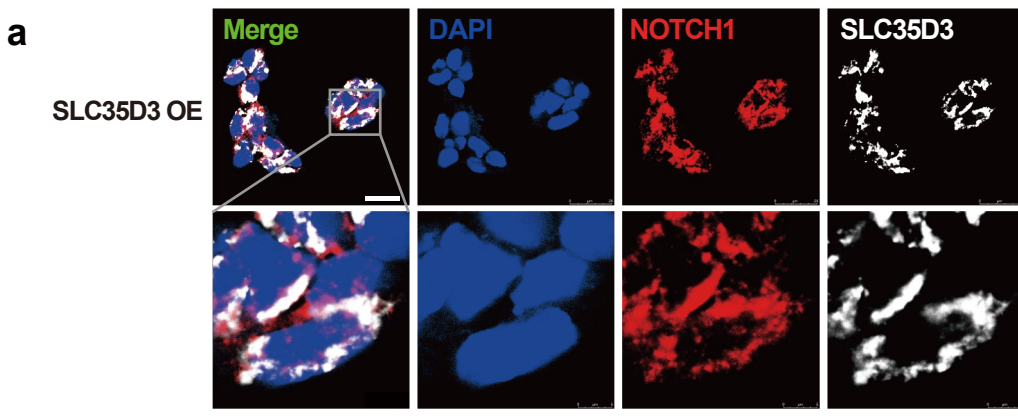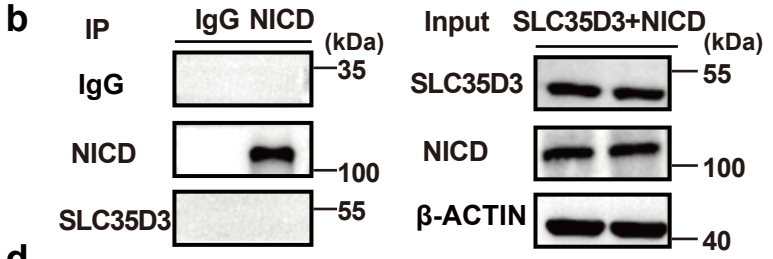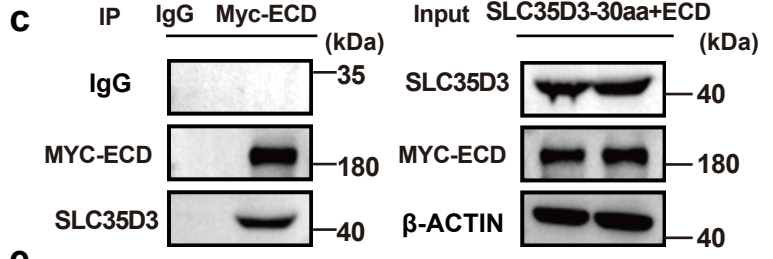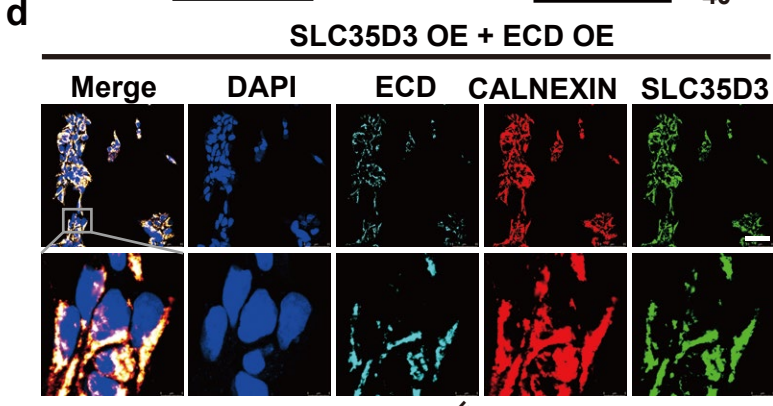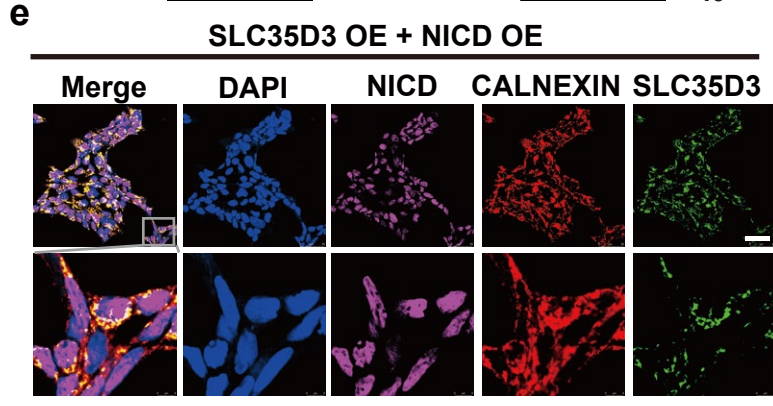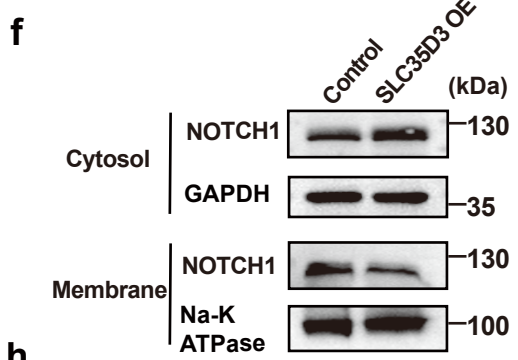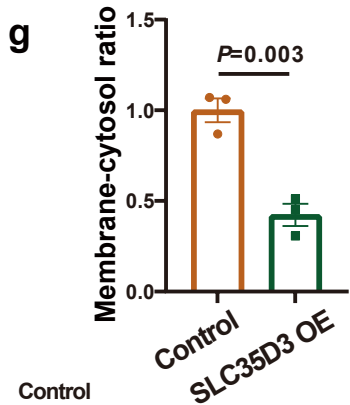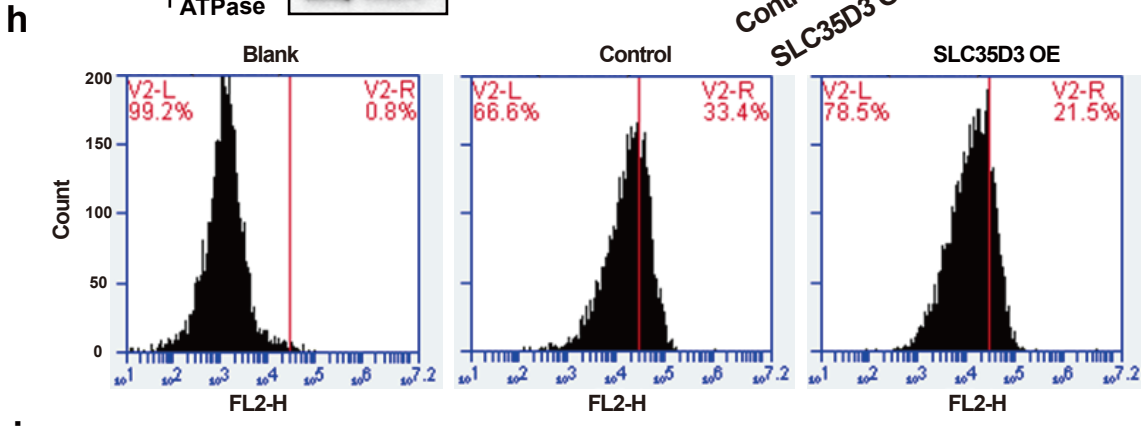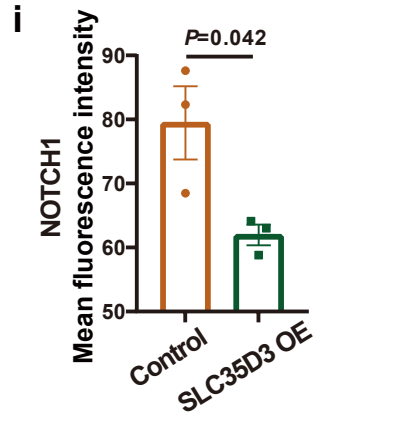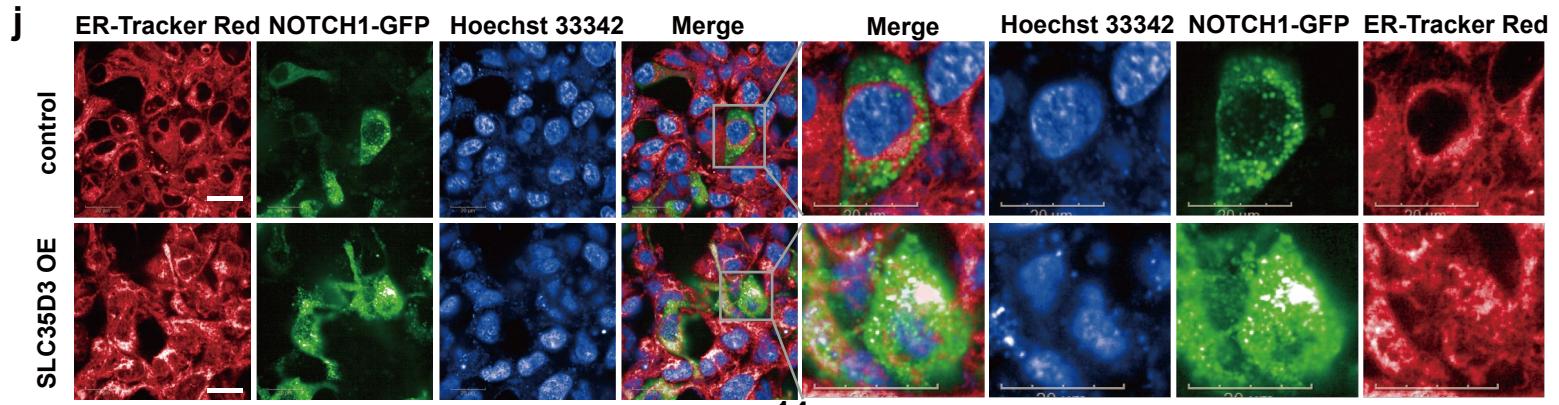

**Supplementary Figure 8. SLC35D3 regulated NOTCH1 export from the ER.**

**a-b** SLC35D3 knockdown reduced the colocalization of NOTCH1 and ER. Representative confocal images of cells are shown (a), as well as the quantification results of four independent parallel experiments (b). The inset in the right panel shows a magnified view of the indicated area. Scale bar, 20  $\mu$ m. CALNEXIN, an ER marker protein. **c-d** SAKI mice showed lower levels of Notch1 at the cell membrane in IngWAT than control mice. Representative confocal images are shown (c), as well as the quantification results of six independent parallel experiments (d). Scale bar, 50  $\mu$ m. Na-K ATPase, a plasma membrane marker protein. Data are expressed as the mean  $\pm$  SEM. Statistical significance was assessed by unpaired two-sided Student's t test (b, d). The exact P values are shown in the figure. ER, endoplasmic reticulum; IngWAT, inguinal white adipose tissue; SAKI, *Slc35d3* adipocyte-specific knockin. Source data are provided as a Source Data file.



**a**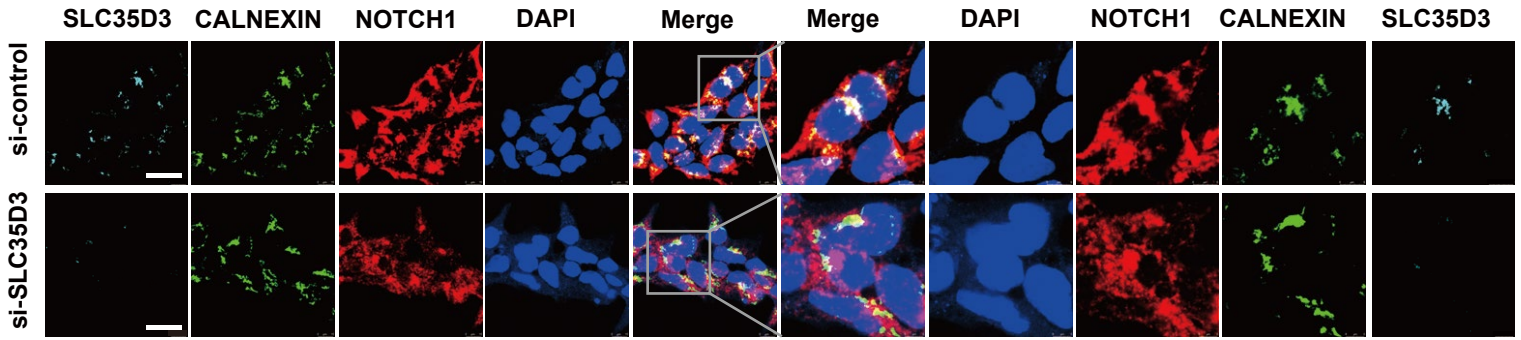**b**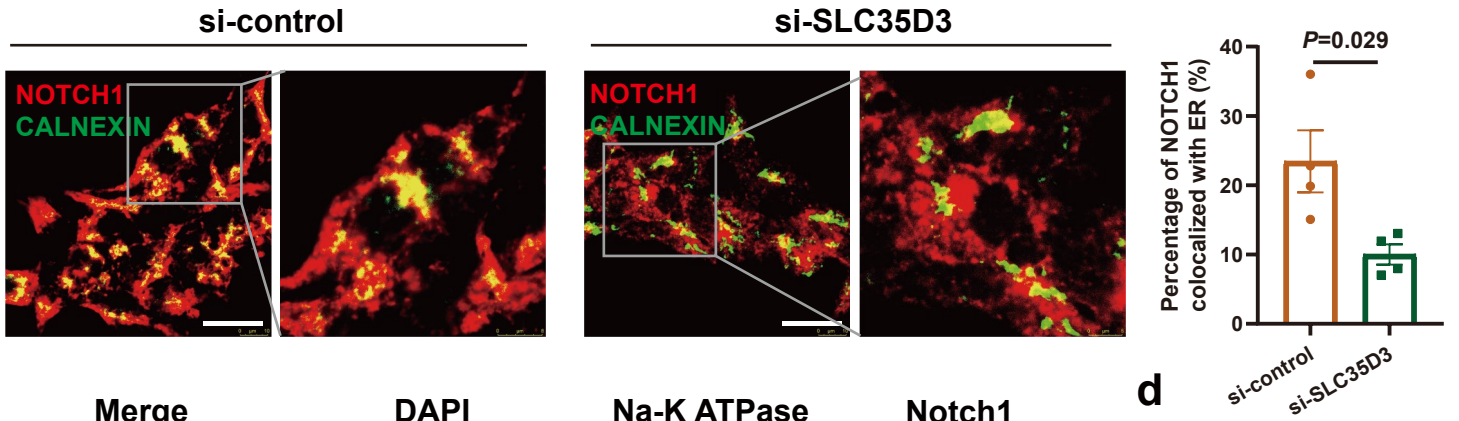**c**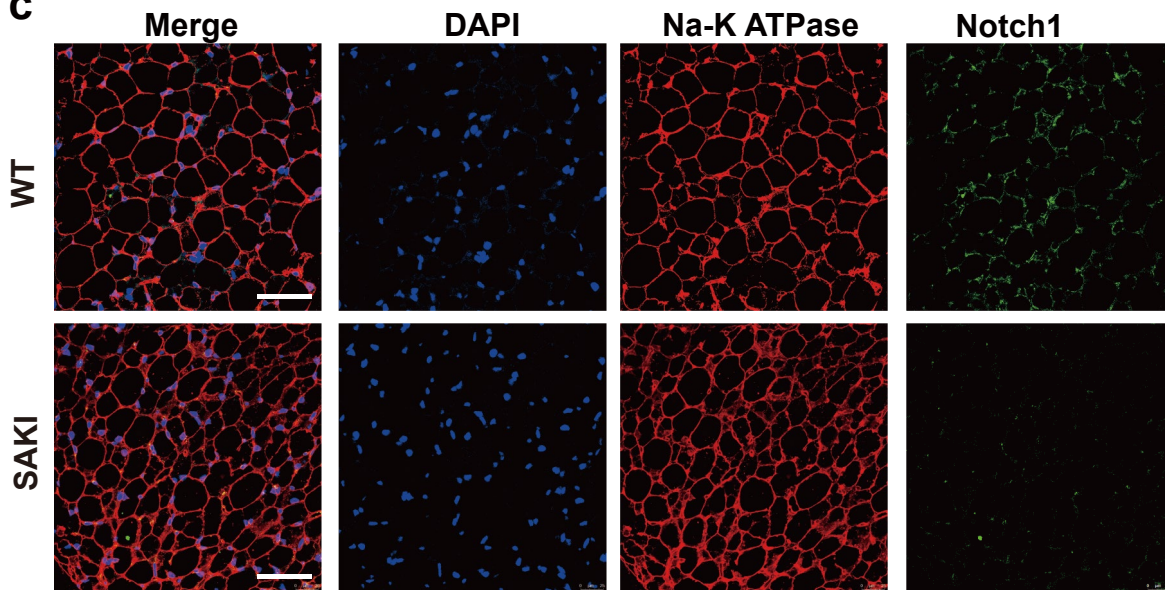**d**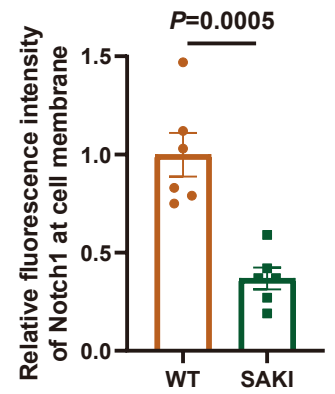

**Supplementary Figure 9. SLC35D3 regulated NOTCH1 levels in the ER and cell membrane.**

**a-d** Representative western blotting results (a) of total NOTCH1, membrane NOTCH1, and ER NOTCH1 proteins at different time points in control and SLC35D3 overexpressing cells. The quantitative analysis results of three independent experiments (b-d) are shown. **e-h** Representative western blotting results (e) of total NOTCH1, membrane NOTCH1, and ER NOTCH1 proteins at different time points in control and SLC35D3 knockdown cells. The quantitative analysis results of three independent experiments (f-h) are shown. **i-j** Representative western blotting results (i) of total NOTCH1, membrane NOTCH1, and ER NOTCH1 proteins 48 h after transfection (i). The quantitative analysis results of NOTCH1 levels at 72 h in three independent experiments (j) are shown. **k** Western blotting results of cell surface biotinylation assays in 293T cells and primary adipocytes; PBS incubation served as a negative control. Representative images from three independent experiments are shown. **l-n** 293T cells were transfected with SLC35D3 plasmid and siRNA, and then cells were harvested 48 h and 72 h after transfection for cell surface biotinylation assays. Representative blots (l) from three independent experiments are shown, as well as the quantitative analysis results of three independent experiments (m-n). Total NOTCH1 expression was normalized to  $\beta$ -ACTIN expression, membrane NOTCH1 expression was normalized to Na-K ATPase, and ER NOTCH1 expression was normalized to CALNEXIN (a-j). Data are expressed as the mean  $\pm$  SEM. Statistical significance was assessed by unpaired two-sided Student's t test (b-d, f-h, j, m-n). The exact P values are shown in the figure. OE, overexpression; ER, endoplasmic reticulum. Source data are provided as a Source Data file.

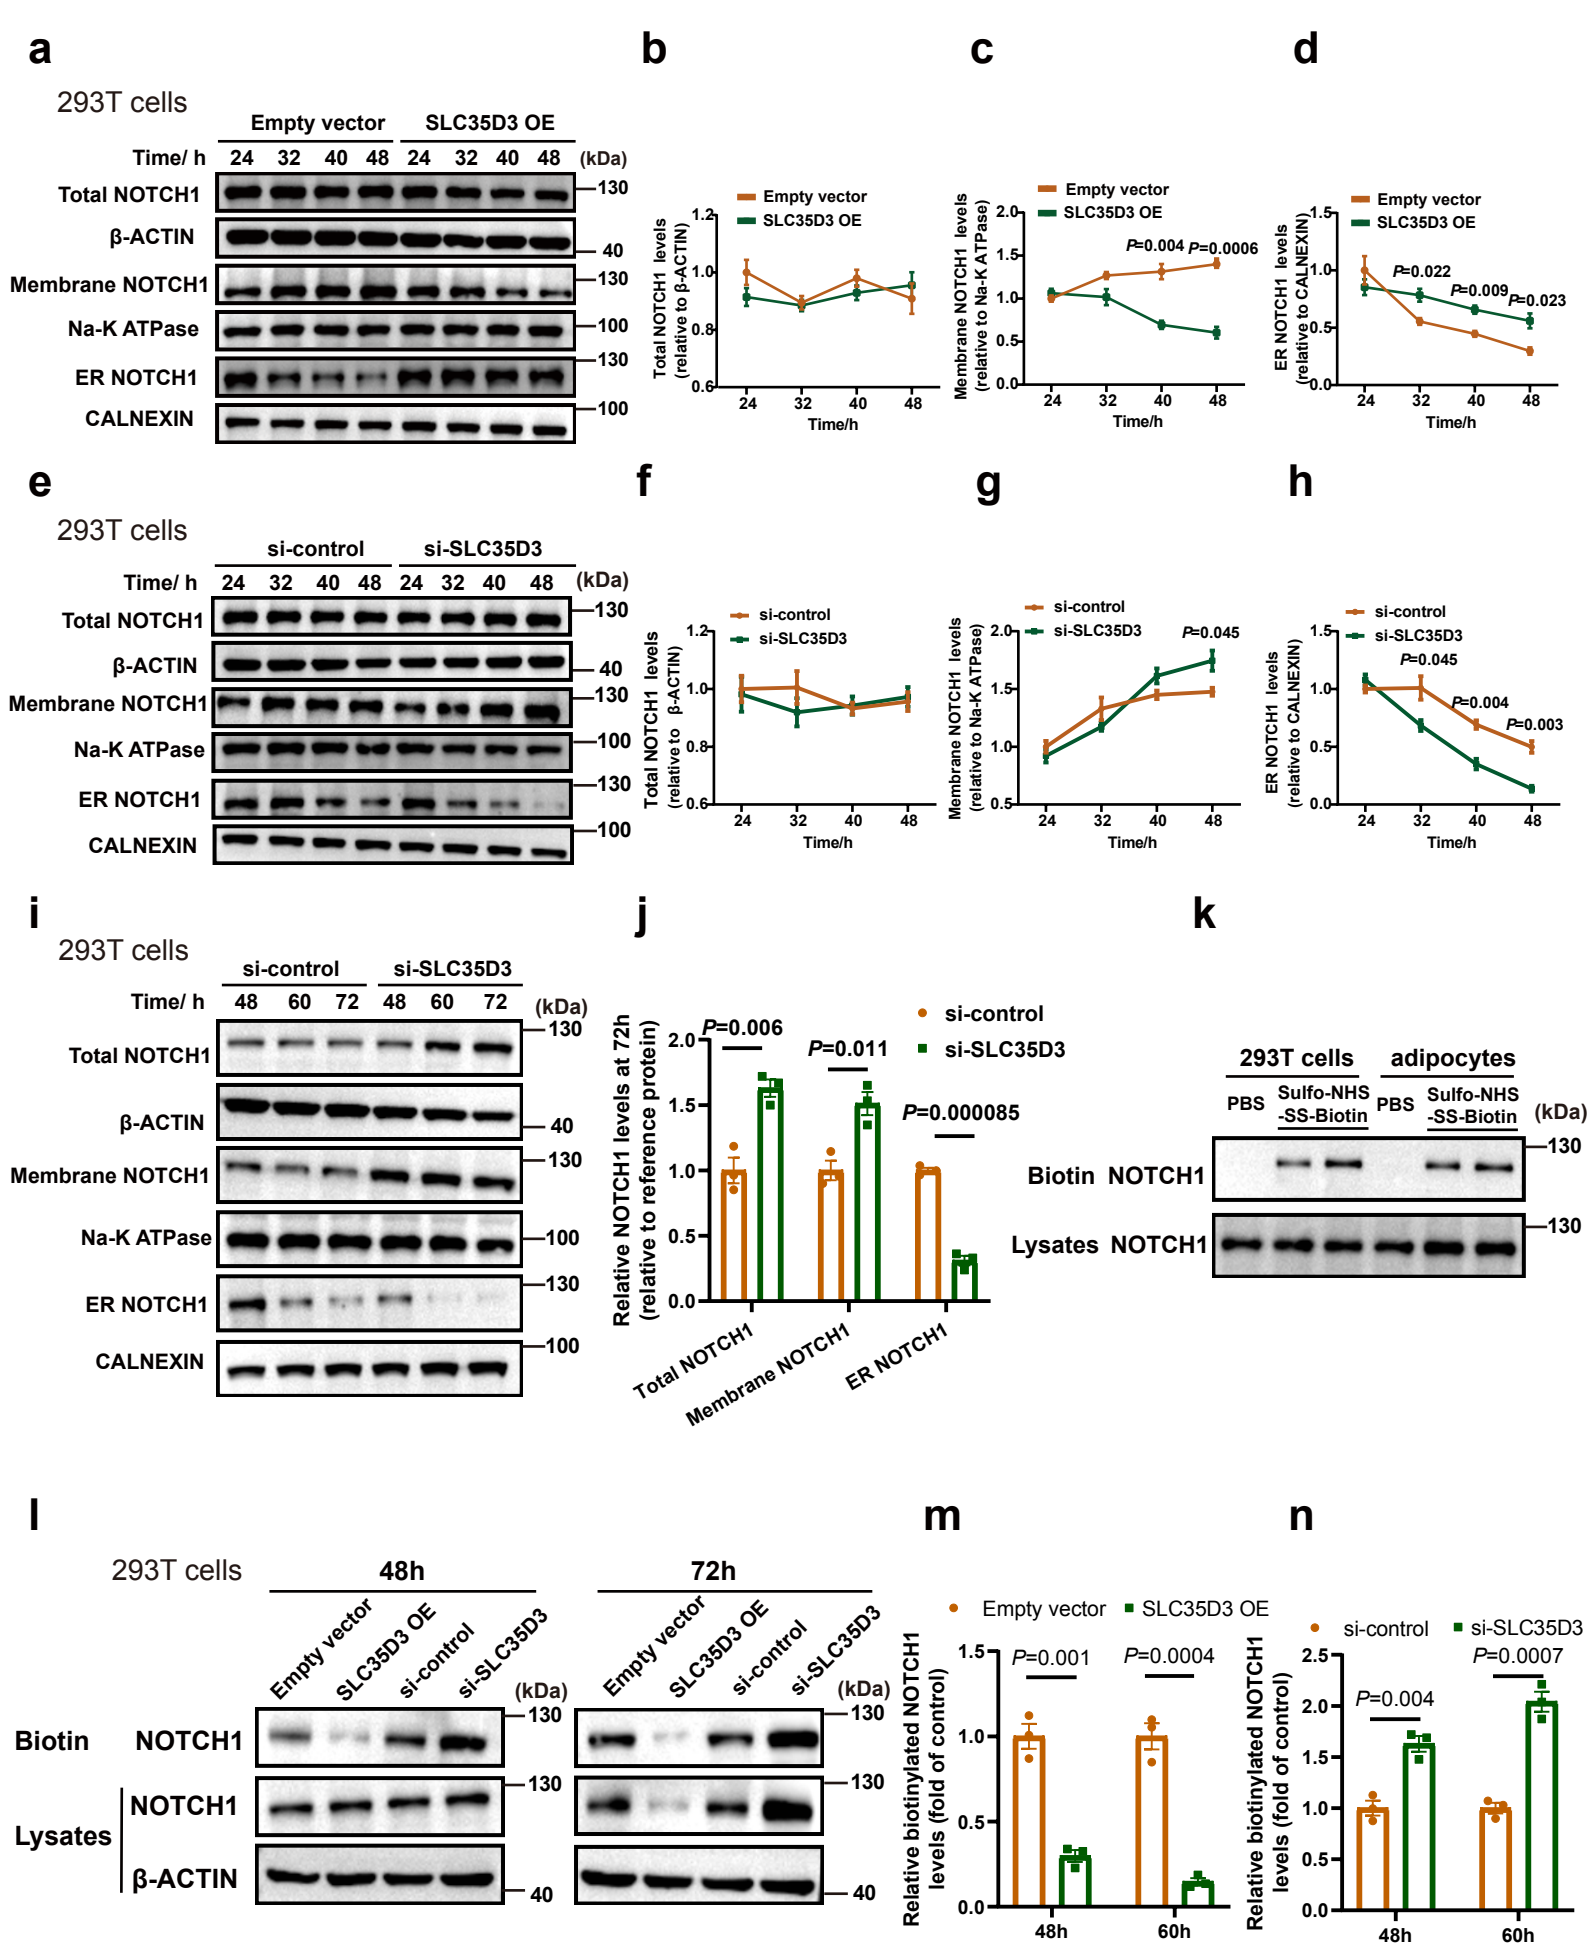

**Supplementary Table 1. Antibodies and dilutions**

| <b>Antibodies</b>        | <b>Brands</b>                      | <b>Dilutions</b> |
|--------------------------|------------------------------------|------------------|
| Anti-SLC35D3             | Thermo scientific, PA572721        | 1:500, 1:1000    |
| Anti-Myc                 | Abcam, ab206486; CST, 2276S        | 1:50, 1:1000     |
| Anti-his                 | CST, 12698S                        | 1:50, 1:1000     |
| Anti-Hes1                | Santa, sc-166410                   | 1:1000           |
| Anti-Notch1              | CST, 3608S; 4380S                  | 1:200, 1:1000    |
| Anti-Nicd                | CST, 4147S                         | 1:200, 1:1000    |
| Anti-Ucp1                | Abcam, ab10983                     | 1:500, 1:1000    |
| Anti-PGC1 $\alpha$       | Proteintech, 66369-1-Ig            | 1:5000           |
| Anti-Prdm16              | Abcam, ab303534                    | 1:1000           |
| Anti-Na/K ATPase         | Abcam, ab76020; ab7671             | 1:500, 1:1000    |
| Anti-Calnexin            | Thermo scientific, MA3027          | 1:500, 1:1000    |
| Anti-Tnf- $\alpha$       | Proteintech, 60291-1-Ig            | 1:1000           |
| Anti-Ccl2                | Proteintech, 66272-1-Ig            | 1:1000           |
| Anti-Il6                 | Huabio, EM1701-45                  | 1:1000           |
| Anti-F4/80               | Proteintech, 28463-1-AP            | 1:2000           |
| Anti-Gapdh               | Proteintech, 60004-1-Ig            | 1:10000          |
| PE-conjugated Notch1     | CST, 15004S                        | 1:50             |
| Alexa Fluor™ 594         | Thermo scientific, PA-11012, 11005 | 1:500            |
| Alexa Fluor™ 488         | Thermo scientific, PA-11034, 11029 | 1:500            |
| HRP-conjugated Anti-ACTB | Proteintech, HRP-60008             | 1:2000           |

---

|                 |                         |        |
|-----------------|-------------------------|--------|
| Anti-Rabbit IgG | Proteintech, SA00001-2  | 1:5000 |
| Anti-Mouse IgG  | Proteintech, SA00001-1  | 1:5000 |
| Anti-Rat IgG    | Proteintech, SA00001-15 | 1:5000 |

---

**Supplementary Table 2. Primer sequences**

| <b>Primer</b>       | <b>Sequence</b>               |
|---------------------|-------------------------------|
| m <i>ACTB</i> -F    | 5'-GGCTGTATTCCCCTCCATCG-3'    |
| m <i>ACTB</i> -R    | 5'-CCAGTTGGTAACAATGCCATGT-3'  |
| m <i>Slc35d3</i> -F | 5'-GTATGTGATCGCCGTCTCCG-3'    |
| m <i>Slc35d3</i> -R | 5'-CCGATCAGGATACAGGCCAC-3'    |
| m <i>Notch1</i> -F  | 5'-GATGGCCTCAATGGGTACAAG-3'   |
| m <i>Notch1</i> -R  | 5'-TCGTTGTTGTTGATGTCACAGT-3'  |
| m <i>Hes1</i> -F    | 5'-TCAACACGACACCGGACAAAC-3'   |
| m <i>Hes1</i> -R    | 5'-ATGCCGGGAGCTATCTTTCTT-3'   |
| m <i>Hey1</i> -F    | 5'-CCGACGAGACCGAATCAATAAC-3'  |
| m <i>Hey1</i> -R    | 5'-TCAGGTGATCCACAGTCATCTG-3'  |
| m <i>Atgl</i> -F    | 5'-TCCGTGGCTGTCTACTAAAGA-3'   |
| m <i>Atgl</i> -R    | 5'-TGGGATATGATGACGTTCTCTCC-3' |
| m <i>Hsl</i> -F     | 5'-GATTTACGCACGATGACACAGT-3'  |
| m <i>Hsl</i> -R     | 5'-ACCTGCAAAGACATTAGACAGC-3'  |
| m <i>Cpt1a</i> -F   | 5'-AGATCAATCGGACCCTAGACAC-3'  |
| m <i>Cpt1a</i> -R   | 5'-CAGCGAGTAGCGCATAGTCA-3'    |
| m <i>Cpt1b</i> -F   | 5'-TCTTCTTCCGACAAACCCTGA-3'   |
| m <i>Cpt1b</i> -R   | 5'-GAGACGGACACAGATAGCCC-3'    |
| m <i>Cpt2</i> -F    | 5'-CAAAAGACTCATCCGCTTTGTTC-3' |
| m <i>Cpt2</i> -R    | 5'-CATCACGACTGGGTTTGGGTA-3'   |

---

|                                   |                               |
|-----------------------------------|-------------------------------|
| <i>mF4/80-F</i>                   | 5'-AGGGTATCATGAGTTGATGGCA-3'  |
| <i>mF4/80-R</i>                   | 5'-TGTACCGTTGAAATAGGACGTG-3'  |
| <i>mIL-6-F</i>                    | 5'-TGATGGATGCTACCAAACCTGGA-3' |
| <i>mIL-6-R</i>                    | 5'-TGTGACTCCAGCTTATCTCTTGG-3' |
| <i>mIL-1<math>\beta</math>-F</i>  | 5'-TGCCACCTTTTGACAGTGATG-3'   |
| <i>mIL-1<math>\beta</math>-R</i>  | 5'-AAGGTCCACGGGAAAGACAC-3'    |
| <i>mTnf-<math>\alpha</math>-F</i> | 5'-GTAGCCCACGTCGTAGCAA-3'     |
| <i>mTnf-<math>\alpha</math>-R</i> | 5'-TAGCAAATCGGCTGACGGTG-3'    |
| <i>mCcl2-F</i>                    | 5'-AGATGCAGTTAACGCCCCAC-3'    |
| <i>mCcl2-R</i>                    | 5'-CCCATTCCTTCTTGGGGTCA-3'    |
| <i>mUcp1-F</i>                    | 5'-CAAAAACAGAAGGATTGCCGAAA-3' |
| <i>mUcp1-R</i>                    | 5'-TCTTGGACTGAGTCGTAGAGG-3'   |
| <i>mPrdm16-F</i>                  | 5'-CCCCACATTCCGCTGTGAT-3'     |
| <i>mPrdm16-R</i>                  | 5'-CTCGCAATCCTTGCACTCA-3'     |
| <i>mPgc1<math>\alpha</math>-F</i> | 5'-TCTGAGTCTGTATGGAGTGACAT-3' |
| <i>mPgc1<math>\alpha</math>-R</i> | 5'-CCAAGTCGTTACATCTAGTTCA-3'  |
| <i>mTbx1-F</i>                    | 5'-GTCAAGGCTCCGGTGAAGAAG-3'   |
| <i>mTbx1-R</i>                    | 5'-GCTGATTGAACTCGTCCCACA-3'   |
| <i>mTmem26-F</i>                  | 5'-TTCTCCGGCCATCTTTGTGTA-3'   |
| <i>mTmem26-R</i>                  | 5'-GTGCTGCAATACTGGTTTCCA-3'   |
| <i>mTnfrsf9-F</i>                 | 5'-GTGCATTGAAGGATTCCATTGC-3'  |
| <i>mTnfrsf9-R</i>                 | 5'-GCCAGTACCGTTCTGGTCATTA-3'  |

---

---

|                       |                                   |
|-----------------------|-----------------------------------|
| <i>mShox2-F</i>       | 5'-CAAAGACGATGCGAAAGGGAT-3'       |
| <i>mShox2-R</i>       | 5'-AGGGTAAAATTGGTCCGACTTC-3'      |
| <i>mROSA26-F</i>      | 5'-GTATGTGATCGCCGTCTCCG-3'        |
| <i>mROSA26-R</i>      | 5'-TGAGCATGTCTTTAATCTACCTCGATG-3' |
| <i>mROSA26-R1</i>     | 5'-GTCAATGGAAAGTCCCTATTGGCGT-3'   |
| <i>mloxP-F</i>        | 5'-GCCTGAGCAACCTGGGCTCAGTAC-3'    |
| <i>mloxP-R</i>        | 5'-AGAAACCCTCCTTGCCTCCATCTC-3'    |
| <i>mAdiponectin-F</i> | 5'-GGATGTGCCATGTGAGTCTG-3'        |
| <i>mAdiponectin-R</i> | 5'-ACGGACAGAAGCATTTC-3'           |

---
